# Supplementary material for: Differential Roles of the mTOR-STAT3 Signaling in Dermal γδ T Cell Effector Function in Skin Inflammation
Source: PubMed Central journal article supplement — Cell Rep. Author manuscript; Available in PMC 2019 Jul 10. (PMC6617524; doi:10.1016/j.celrep.2019.05.019), 2019-06-04
Supplement: NIHMS1531460-supplement-1.pdf [file NIHMS1531460-supplement-1.pdf]

**Cell Reports, Volume 27**

**Supplemental Information**

**Differential Roles of the mTOR-STAT3 Signaling  
in Dermal  $\gamma\delta$  T Cell Effector Function  
in Skin Inflammation**

**Yihua Cai, Feng Xue, Hui Qin, Xu Chen, Na Liu, Chris Fleming, Xiaoling Hu, Huang-ge Zhang, Fuxiang Chen, Jie Zheng, and Jun Yan**

## Supplementary Figures

### Figure S1

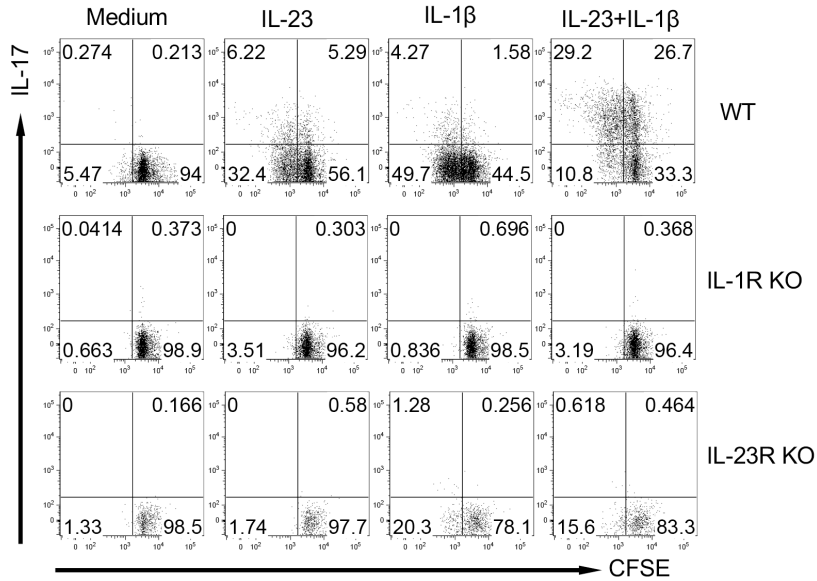

**Figure S1. IL-1R and IL-23R signaling pathways regulate dermal  $\gamma\delta$ T cell expansion and IL-17 production.** Whole skin cell suspensions from WT, IL-1R KO and IL-23R KO mice were labeled with CFSE and then stimulated with IL-23, IL-1 $\beta$ , or IL-23 plus IL-1 $\beta$  for 3 days. Cell proliferation and intracellular IL-17 were analyzed by flow cytometry. Flow plots gated on CD3<sup>+</sup> $\gamma\delta$ TCR<sup>int</sup> cells are representative of at least two independent experiments with similar results. Each experiment includes at least three mice from WT, IL-1R KO or IL-23R KO strains. Related to Figure 1.

**Figure S2**

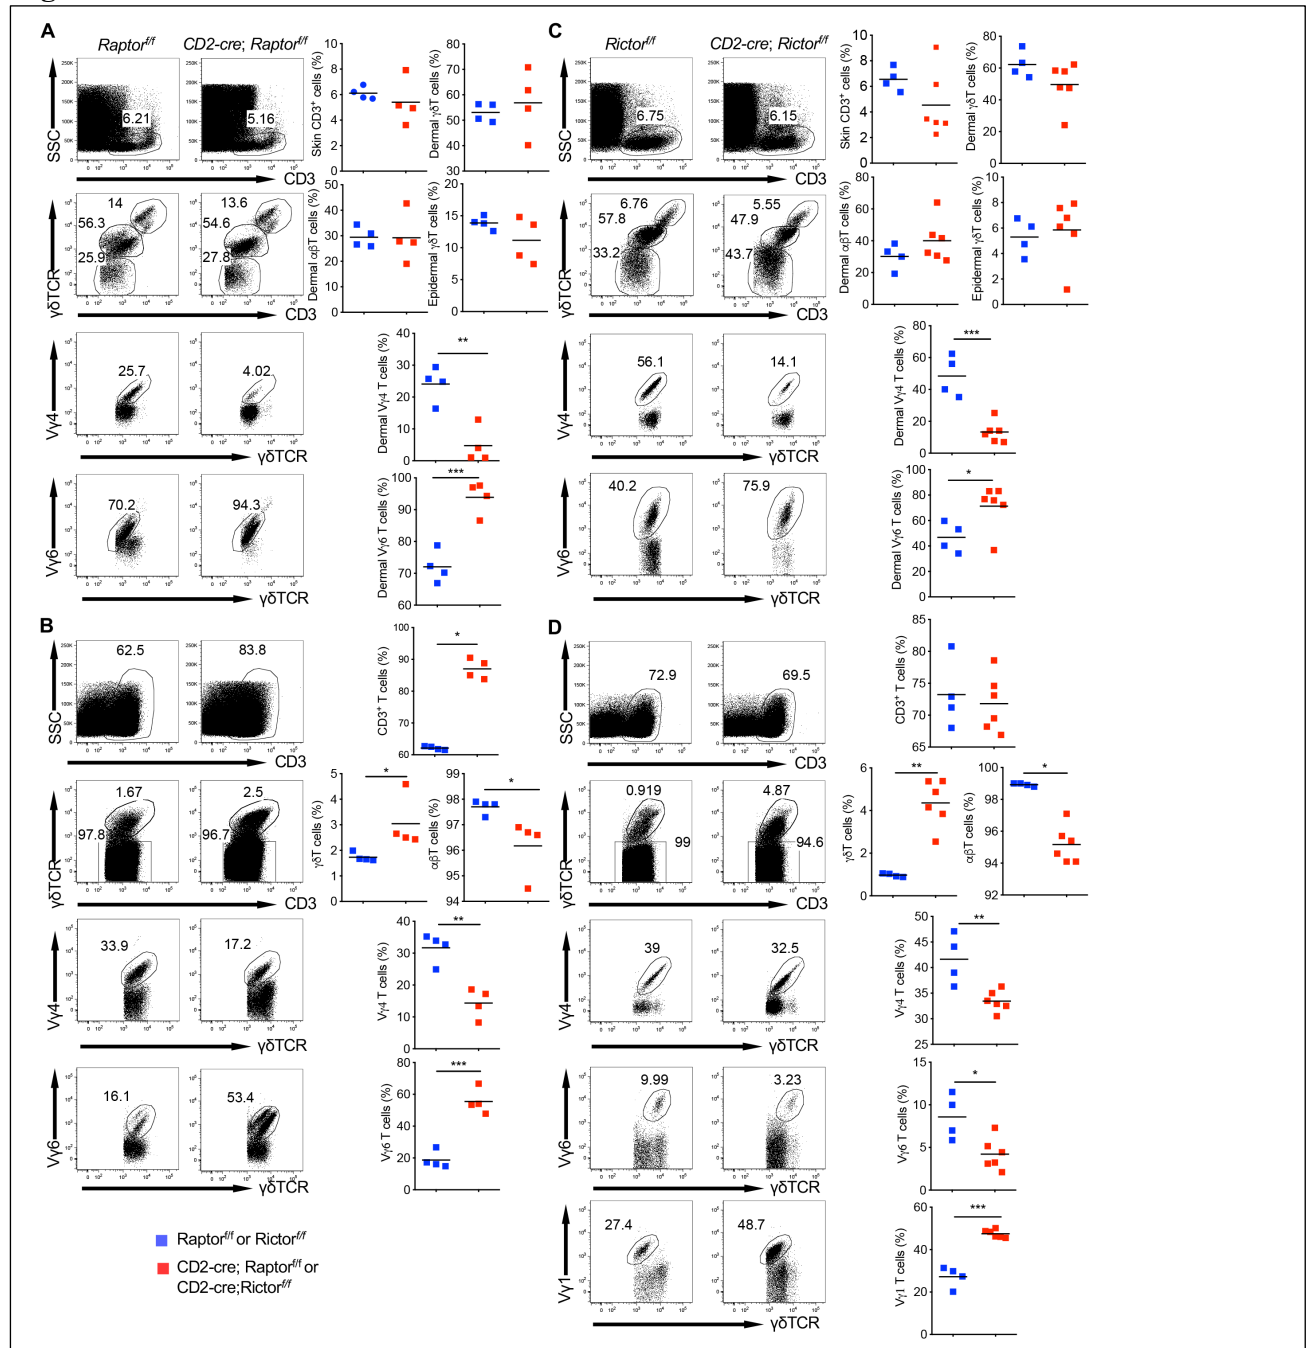

**Figure S2. mTOR signaling is critical in  $\gamma\delta$ T cell homeostasis in the periphery.** (A, B) Skin tissues (A) and lymph nodes (B) from control *Raptor<sup>fl/fl</sup>* mice and *CD2-cre;Raptor<sup>fl/fl</sup>* mice were stained with CD3,  $\alpha\beta$ TCR,  $\gamma\delta$ TCR, V $\gamma$ 4, and V $\gamma$ 6. Percentages of CD3+ T cells,  $\alpha\beta$ T cells, dermal  $\gamma\delta$ T cells ( $CD3^+\gamma\delta TCR^{int}$ ) and epidermal  $\gamma\delta$ T cells ( $CD3^+\gamma\delta TCR^{hi}$ ) and different subsets of  $\gamma\delta$ T cells are shown. Data are representative of at least two independent experiments with similar results. Data are shown as mean  $\pm$  SEM. \* $p < 0.05$ , \*\* $p < 0.01$ , \*\*\* $p < 0.001$  (unpaired Student's t test). (C, D) Skin tissues (C) and lymph nodes (D) from control *Rictor<sup>fl/fl</sup>* mice and *CD2-cre;Rictor<sup>fl/fl</sup>* mice were stained with CD3,  $\alpha\beta$ TCR,  $\gamma\delta$ TCR, V $\gamma$ 4, and V $\gamma$ 6. Percentages of CD3+ T cells,  $\alpha\beta$ T cells, dermal  $\gamma\delta$ T cells ( $CD3^+\gamma\delta TCR^{int}$ ) and epidermal  $\gamma\delta$ T cells ( $CD3^+\gamma\delta TCR^{hi}$ ) and different subsets of  $\gamma\delta$ T cells are shown. Data are representative of at least two independent experiments with similar results. Data are shown as mean  $\pm$  SEM. \* $p < 0.05$ , \*\* $p < 0.01$ , \*\*\* $p < 0.001$  (unpaired Student's t test). Related to Figure 3.

**Figure S3**

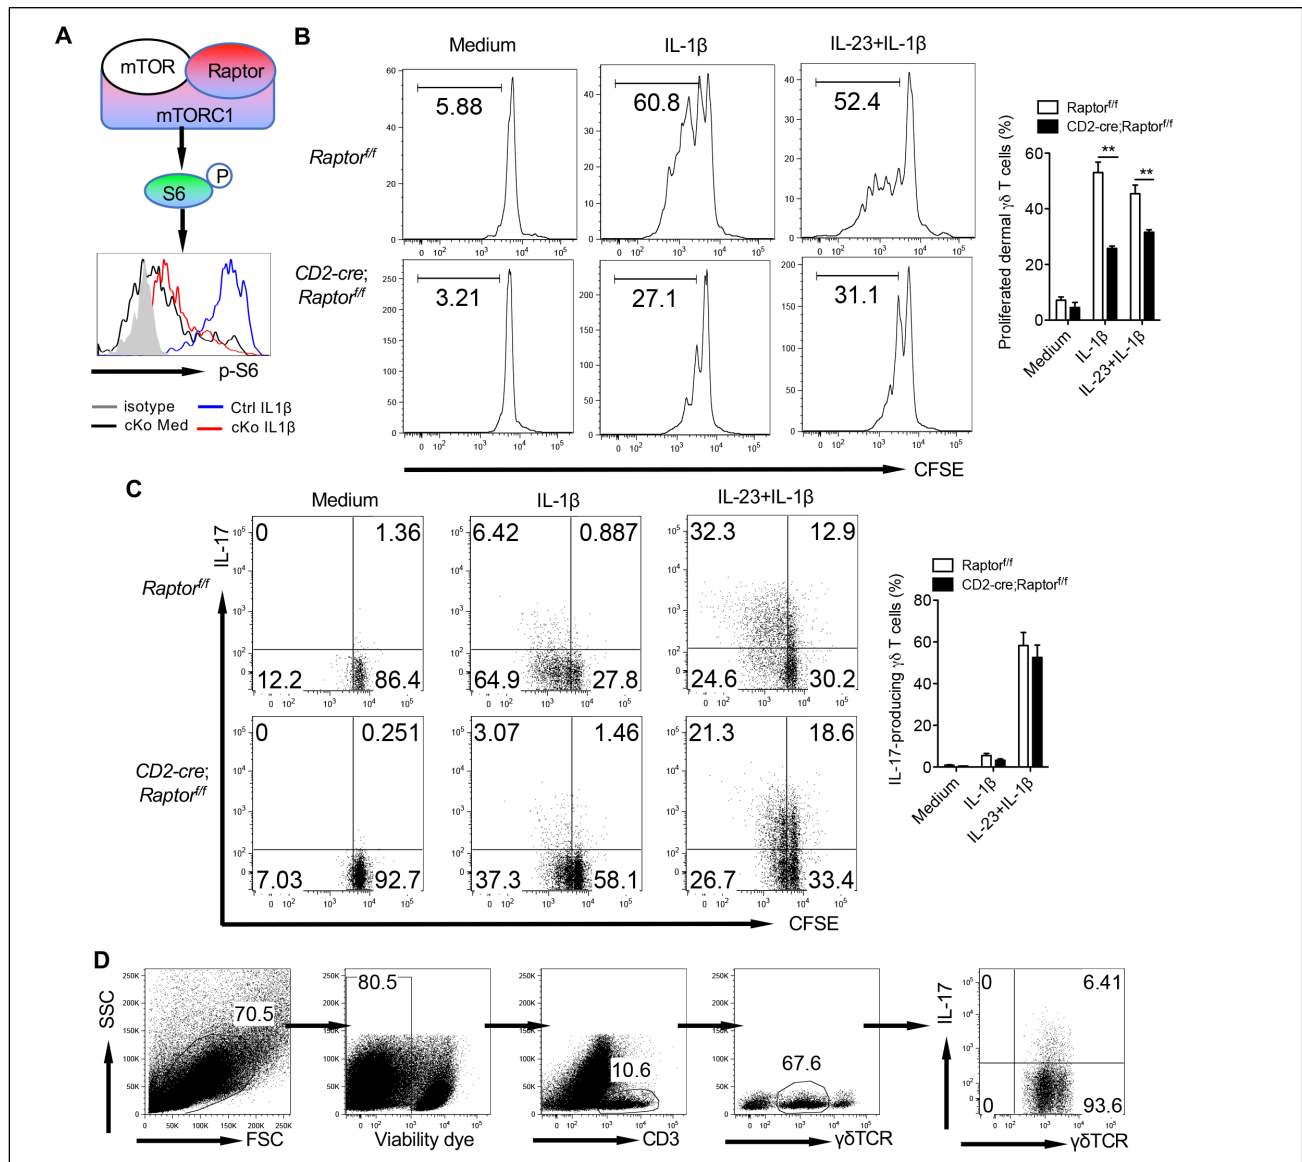

**Figure S3. Roles of mTORC1 signaling in dermal  $\gamma\delta$ T cell proliferation and IL-17 production.** (A) Schematic of mTORC1 with representative histogram showing abolished mTORC1 activity (p-S6) in Raptor-deficient dermal  $\gamma\delta$  T cells upon IL-1 $\beta$  stimulation. (B, C) Whole skin cell suspensions from CD2-cre;Raptor<sup>fl/fl</sup> or control Raptor<sup>fl/fl</sup> mice (n=3-4) were labeled with CFSE and then stimulated with IL-1 $\beta$  or IL-23 plus IL-1 $\beta$  for 3 days. CFSE dilution (B) and intracellular IL-17 production (C) by dermal  $\gamma\delta$  T cells were determined by flow cytometry. Flow plots gated on CD3<sup>+</sup> $\gamma\delta$ TCR<sup>Int</sup> cells are representative of at least three independent experiments with similar results. Data are shown as mean  $\pm$  SEM. \*\*p < 0.01 (unpaired Student's t test). (D) Gating strategy for dermal  $\gamma\delta$  T cells and IL-17 production upon stimulation shown in Figure 3E. Related to Figure 3.

**Figure S4**

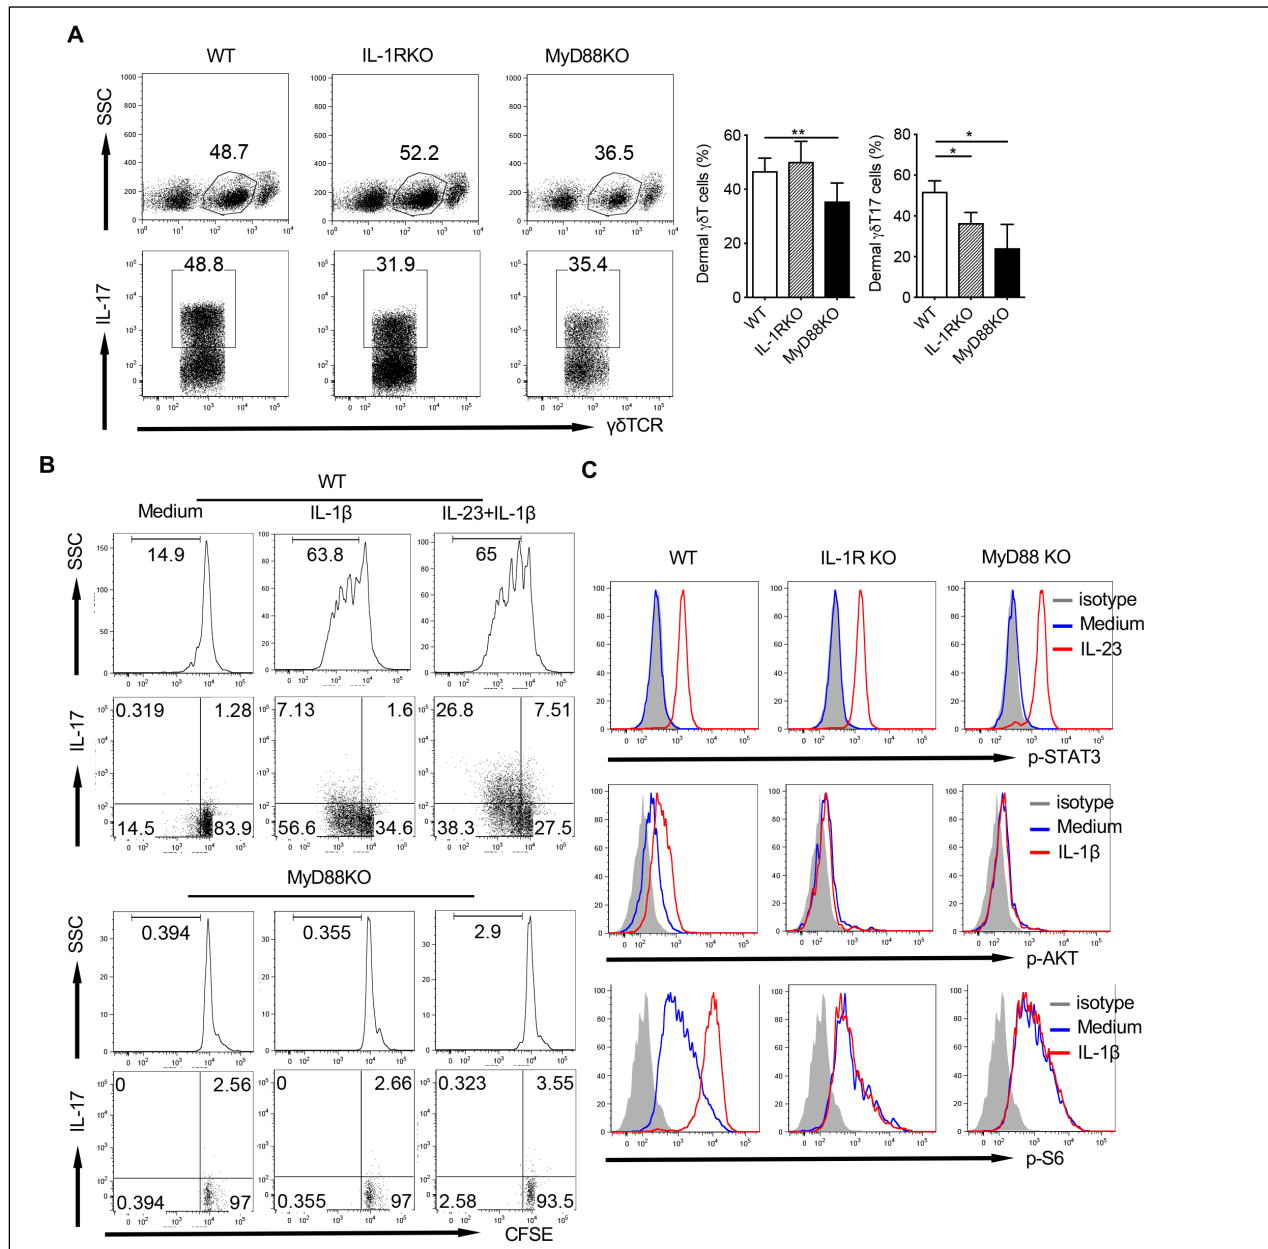

**Figure S4. MyD88-mediated signaling pathway is essential in IL-1 $\beta$ -induced dermal  $\gamma\delta$ T cell activation.** (A) The frequency of dermal  $\gamma\delta$ T cells (n=6) and the percentage of IL-17-producing  $\gamma\delta$ T cells (n=3) after PMA plus ionomycin stimulation in C57BL/6 WT, IL-1R KO and MyD88 KO mice are shown. Flow plots gated on CD3<sup>+</sup> cells (top) or CD3<sup>+</sup> $\gamma\delta$ TCR<sup>int</sup> cells (bottom) are representative of two independent experiments with similar results. Data are shown as mean  $\pm$  SD. \*p < 0.05, \*\*p < 0.01 (one-way ANOVA). (B) Whole skin cell suspensions from C57BL/6 WT or MyD88 KO mice were labeled with CFSE and then stimulated with IL-1 $\beta$  or IL-23 plus IL-1 $\beta$  for 3 days. CFSE dilution and intracellular IL-17 production by dermal  $\gamma\delta$  T cells were determined by flow cytometry. Flow plots gated on CD3<sup>+</sup>  $\gamma\delta$ TCR<sup>int</sup> cells are representative of at least three independent experiments with similar results. (C) Cultured skin  $\gamma\delta$  T cell lines from C57BL/6 WT, IL-1RKO and MyD88KO mice were stimulated with IL-23 or IL-1 $\beta$  for 30 minutes. p-Stat3, p-AKT and p-S6 were examined by flow cytometry. Flow plots gated on CD3<sup>+</sup>  $\gamma\delta$ TCR<sup>+</sup> cells are representative of at least two independent experiments with similar results. Plots from WT mice were the same shown in Figure 3B. Related to Figures 2 & 3.

**Figure S5**

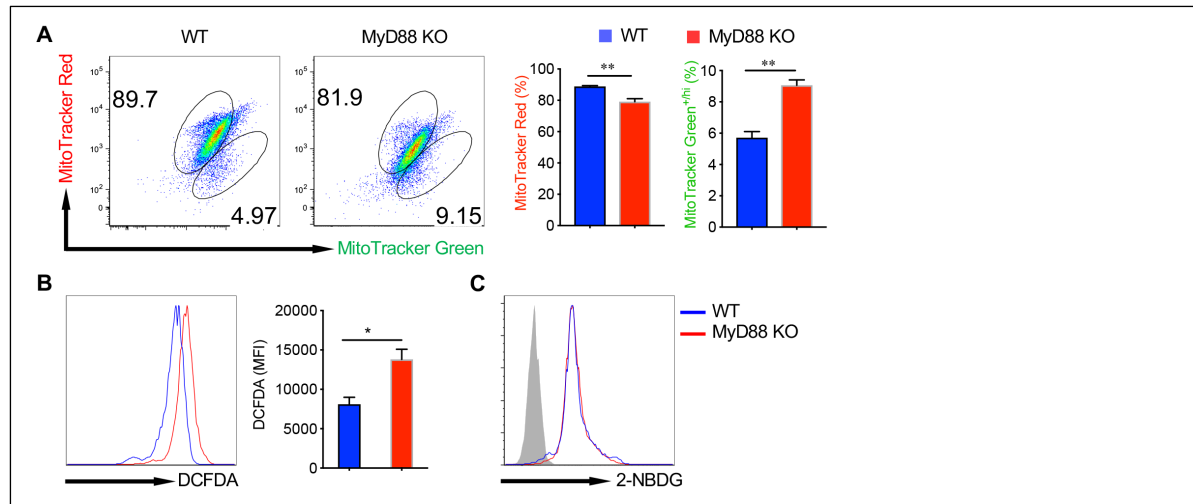

**Figure S5. Reduced respiring mitochondria with enhanced ROS production in MyD88 KO dermal  $\gamma\delta$ T cells.** (A) Whole skin cell suspensions from WT and MyD88 KO mice (n=3) were stained with MitoTracker Green and MitoTracker Red. Percentages of MitoTracker Green<sup>+hi</sup> and MitoTracker Red were analyzed by flow cytometry. Flow plots gated on CD3<sup>+</sup> $\gamma\delta$ TCR<sup>int</sup> cells are representative of two independent experiments with similar results. Percentages of MitoTracker Green<sup>+hi</sup> and MitoTracker Red<sup>+</sup> dermal  $\gamma\delta$ T cells are shown as mean  $\pm$  SEM. \*\*p < 0.01 (unpaired Student's t test). (B, C) Whole skin cell suspensions from WT or MyD88 KO mice were stained with DCFDA (B) or 2-NBDG (C). Expressions of DCFDA and 2-NBDG were analyzed by flow cytometry. Flow histograms gated on CD3<sup>+</sup> $\gamma\delta$ TCR<sup>int</sup> cells are representative of two independent experiments with similar results. Summarized DCFDA MFI data are shown as mean  $\pm$  SEM. \*p < 0.05, \*\*p < 0.01 (unpaired Student's t test). MFI: mean fluorescent intensity. Related to Figure 4.

**Figure S6**

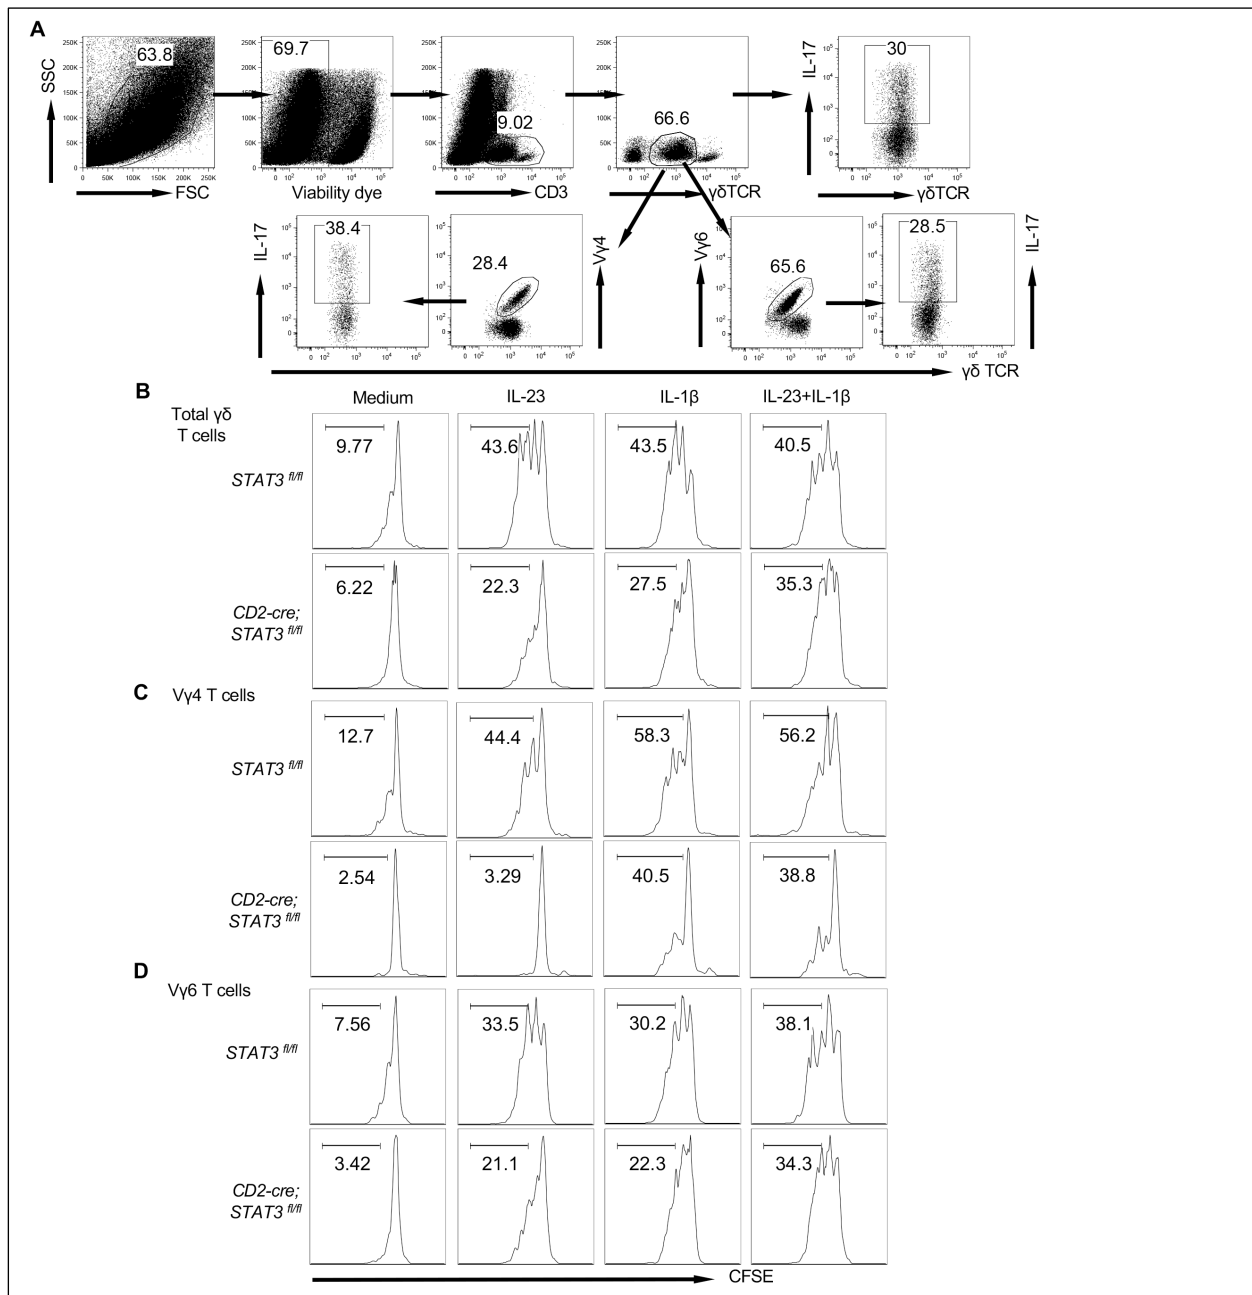

**Figure S6. Roles of STAT3 signaling in dermal  $\gamma\delta$ T cell proliferation.** (A, B, C, D) Whole skin cell suspensions from CD2-cre;Stat3<sup>fl/fl</sup> or control Stat3<sup>fl/fl</sup> mice were labeled with CFSE and then stimulated with IL-1 $\beta$ , IL-23 or IL-23 plus IL-1 $\beta$  for 3 days. Gating strategy is shown (A). Dermal  $\gamma\delta$ T cell proliferation (CFSE dilution) was determined by flow cytometry. Flow plots gated on CD3<sup>+</sup> $\gamma\delta$ TCR<sup>int</sup> cells (B), on CD3<sup>+</sup> $\gamma\delta$ TCR<sup>int</sup> V $\gamma$ 4 (C), or V $\gamma$ 6 (D) cells are representative of at least three independent experiments with similar results. Related to Figure 5.

**Figure S7**

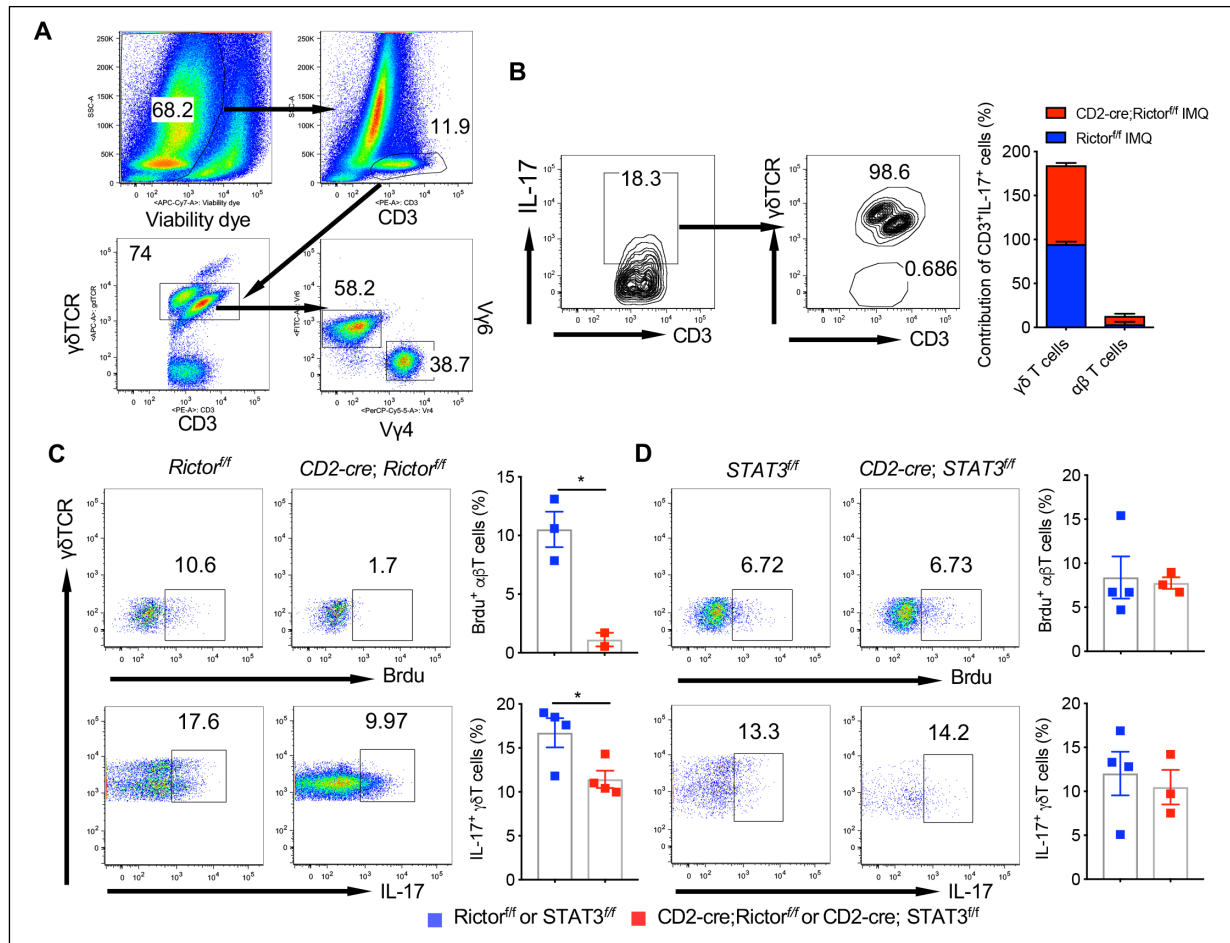

**Figure S7. Dermal  $\gamma\delta$ T cells are the major cellular source of IL-17 in the inflamed skin.** (A) Gating strategy for dermal  $V\gamma 4$  and  $V\gamma 6$  T cells in control and Rictor cKO or STAT3 cKO mice treated with IMQ. (B)  $CD2\text{-}cre; Rictor^{ff}$  or control  $Rictor^{ff}$  mice ( $n=3$ ) were treated daily for 5 days with IMQ or vehicle control. Single cells were stained for intracellular IL-17 without further stimulation. Flow plots were gated from  $CD3^+IL-17^+$  cells first and percentages of  $CD3^+\gamma\delta TCR^+$  cells ( $\alpha\beta$  T cells) or  $CD3^+\gamma\delta TCR^{int}$  ( $\gamma\delta$  T cells) were examined. Summarized data combined from three independent experiments are shown as mean  $\pm$  SEM. (C, D)  $CD2\text{-}cre; Rictor^{ff}$  or control  $Rictor^{ff}$  mice (C) and  $CD2\text{-}cre; Stat3^{ff}$  or control  $Stat3^{ff}$  mice (D) were applied topically with IMQ for 5 days. BrdU were injected one day before mice were sacrificed. Skin single cell suspensions were stained for BrdU (gated on  $CD3^+\gamma\delta TCR^+$ ) and spontaneous IL-17 production without stimulation (gated on  $CD3^+\gamma\delta TCR^{int}$ ). Flow plots are representative of two independent experiments with similar results. Data are shown as mean  $\pm$  SEM. \* $p<0.05$ , \*\* $p<0.01$  (unpaired Student's t test). Related to Figure 7.
